# Supplementary material for: Cannabis Smoke Extract Disrupts Trophoblast Differentiation and Causes Mitochondrial Dysfunction Beyond the Effects Of Δ9-THC Alone
Source: Research Square preprint supplement (doi:10.21203/rs.3.rs-7546936/v1), 2025-09-10
Supplement: Supplementary file 1 [file 98f7550a73e5093e4c8e6dea.docx]

**Cannabis Smoke Extract Disrupts Trophoblast Differentiation and Causes Mitochondrial Dysfunction Beyond the Effects Of Δ9-THC Alone**

Cristina Monaco1, Mahek Minhas1,2, Tina Podinic1, Joshua P Nederveen1,2, Amica-Mariae Lucas3, Thane Tomy3, Gregg T Tomy3, Alison C Holloway4, Sandeep Raha1*

1 Department of Pediatrics, McMaster University, Faculty of Health Sciences, 1280 Main St. W. Hamilton, ON L8S 4K1, Canada

2 Department of Kinesiology, McMaster University, 1280 Main St. W., Hamilton, ON L8S 4K1, Canada

3 Department of Chemistry, Centre for Oil and Gas Research and Development (COGRAD), University of Manitoba, 586 Parker Building, 144 Dysart Rd., Winnipeg, MB R3T 2N2, Canada

4 Department of Obstetrics and Gynecology, McMaster University, Hamilton, ON L8S 4K1, Canada

*Corresponding author

Email: rahas@mcmaster.ca

**Supplementary Information**

**Supplementary Tables and Figures.**

**Table S1.** Primer sequences of human genes analyzed by real-time qPCR

| Gene | Forward (5′→3′) | Reverse (5′→3′) |  |  |
| --- | --- | --- | --- | --- |
| *CYP1A1* | CAAGGGGCGTTGTGTCTTTG | GTCGATAGCACCATCAGGGG | | |
| *AhR* | TAACCCAGACCAGATTCCTC | GCAAACAAAGCCAACTGAG | | |
| *AhRR* | CGCCTCAGTGTCAGTTACC | ACTCACGACCAGAGCAAAG | | |
| *CGA* | GCAGGATTGCCCAGAATGC | TCTTGGACCTTAGTGGAGTGG | | |
| *CGB* | ACCCCTTGACCTGTGAT | CTTTATTGTGGGAGGATCGG | | |
| *Ki67* | CGTCCCAGTGGAAGAGTTGT | CGACCCCGCTCCTTTTGATA | | |
| *ERVW-1* | GTTAATGACATCAAAGGCACCC | CCCCATCTCAACAGGAAAACC | | |
| *HSP60* | GAAGGCATGAAGTTTGATCG | TTCAAGAGCAGGTACAATGG | | |
| *HSP70* | GGAGTTCAAGAGAAAACACAAG | AAGTCGATGCCCTCAAAC | |  |
| *SOD1* | AAAGATGGTGTGGCCGATGT | CAAGCCAAACGACTTCCAGC | | |
| *SOD2* | GCTCCGGTTTTGGGGTATCT | GATCTGCGCGTTGATGTGAG | | |
| *MFN-1* | TTGGAGCGGAGACTTAGCAT | GCCTTCTTAGCCAGCACAAAG | | |
| *MFN-2* | CACAAGGTGAGTGAGCGTCT | ACCAGGAAGCTGGTACAACG | | |
| *OPA-1* | GCTCTGCATACATCTGAAGAACA | AGAGGCTGGACAAAAGACGTT | | |
| *DRP-1* | AAACTTCGGAGCTATGCGGT | AGGTTCGCCCAAAAGTCTCA | | |
| *DAGL* | TGCTCTTCGGCCTGGTCTAT | CGCATGCTCAGCCAGATGAT | | |
| *MAGL* | CAAGGCCCTCATCTTTGTGT | ACGTGGAAGTCAGACACTAC | | |
| *NAPE-PLD* | AGATGGCTGATAATGGAGAA | TTCTCCTCCCACCAGTC | |  |
| *PPARγ* | AGTGGGGATGTCTCATAATGCC | AGCTCAGCGGACTCTGGATTC | | |
| *FAAH* | AAGGTGATTTCGTGGACCCC | AATGTTCCATCTGGGCCTCG | | |
| *TRPV-1* | AGCACCTCACAGACAACGAG | ATGGTGGTGTTCTGTCCGTC | | |
| *18S* | CACGCCACAAGATCCCA | AAGTGACGCAGCCCTCTATG | | |
| *B-actin* | TTACAGGAAGTCCCTTGCCATC | GCAATGCTATCACCTCCCCTG | | |

**Fig. S1. CaSE significantly reduces cellular viability at concentrations above 10% CaSE.** BeWo b30 cells were treated with vehicle, and varying concentrations of CaSE (0.1%, 0.5%, 1.0%, 2.5%, 5.0%, 10.0%, 15.0%, 25.0%, 50%, 75%) during differentiation and monitored at 48 hours for cellular viability using an Alamar Blue assay. Significant differences were determined by a one-way ANOVA and corrected by a post-hoc Tukey test. Each value is presented as mean ± SEM (n=6). Different letters denote significant differences of *p* < 0.05.

**Figure S2. CaSE disrupts mitochondrial bioenergetic parameters at concentrations above 5.0% CaSE.** BeWo b30 cells were treated with vehicle (0.1% methanol), 1 μM THC, 10 μM THC, 1%, 2.5%, 5.0% and 10% CaSE for 48 hours during differentiation, and subjected to the mitochondrial stress test. Basal OCR tracings were obtained using the Seahorse XFe24 Analyzer using the sequential addition of oligomycin, FCCP and antimycin A/rotenone; values were normalized to total protein content via the BCA assay (μg/mL). The detection of OCR was performed with four technical replicates per experiment, for each treatment condition, and repeated three more times (n=3 biological replicates). Group mean and SEM are displayed below (**a-c).** Arrows indicate the sequential addition of the respective compounds. Significant differences were determined by a one-way ANOVA and corrected by a post-hoc Tukey test. Different letters denote significant differences of p < 0.05. (**a)** Proton leak, **(b)** Maximal respiration, **(c)** Non-mitochondrial respiration.

**
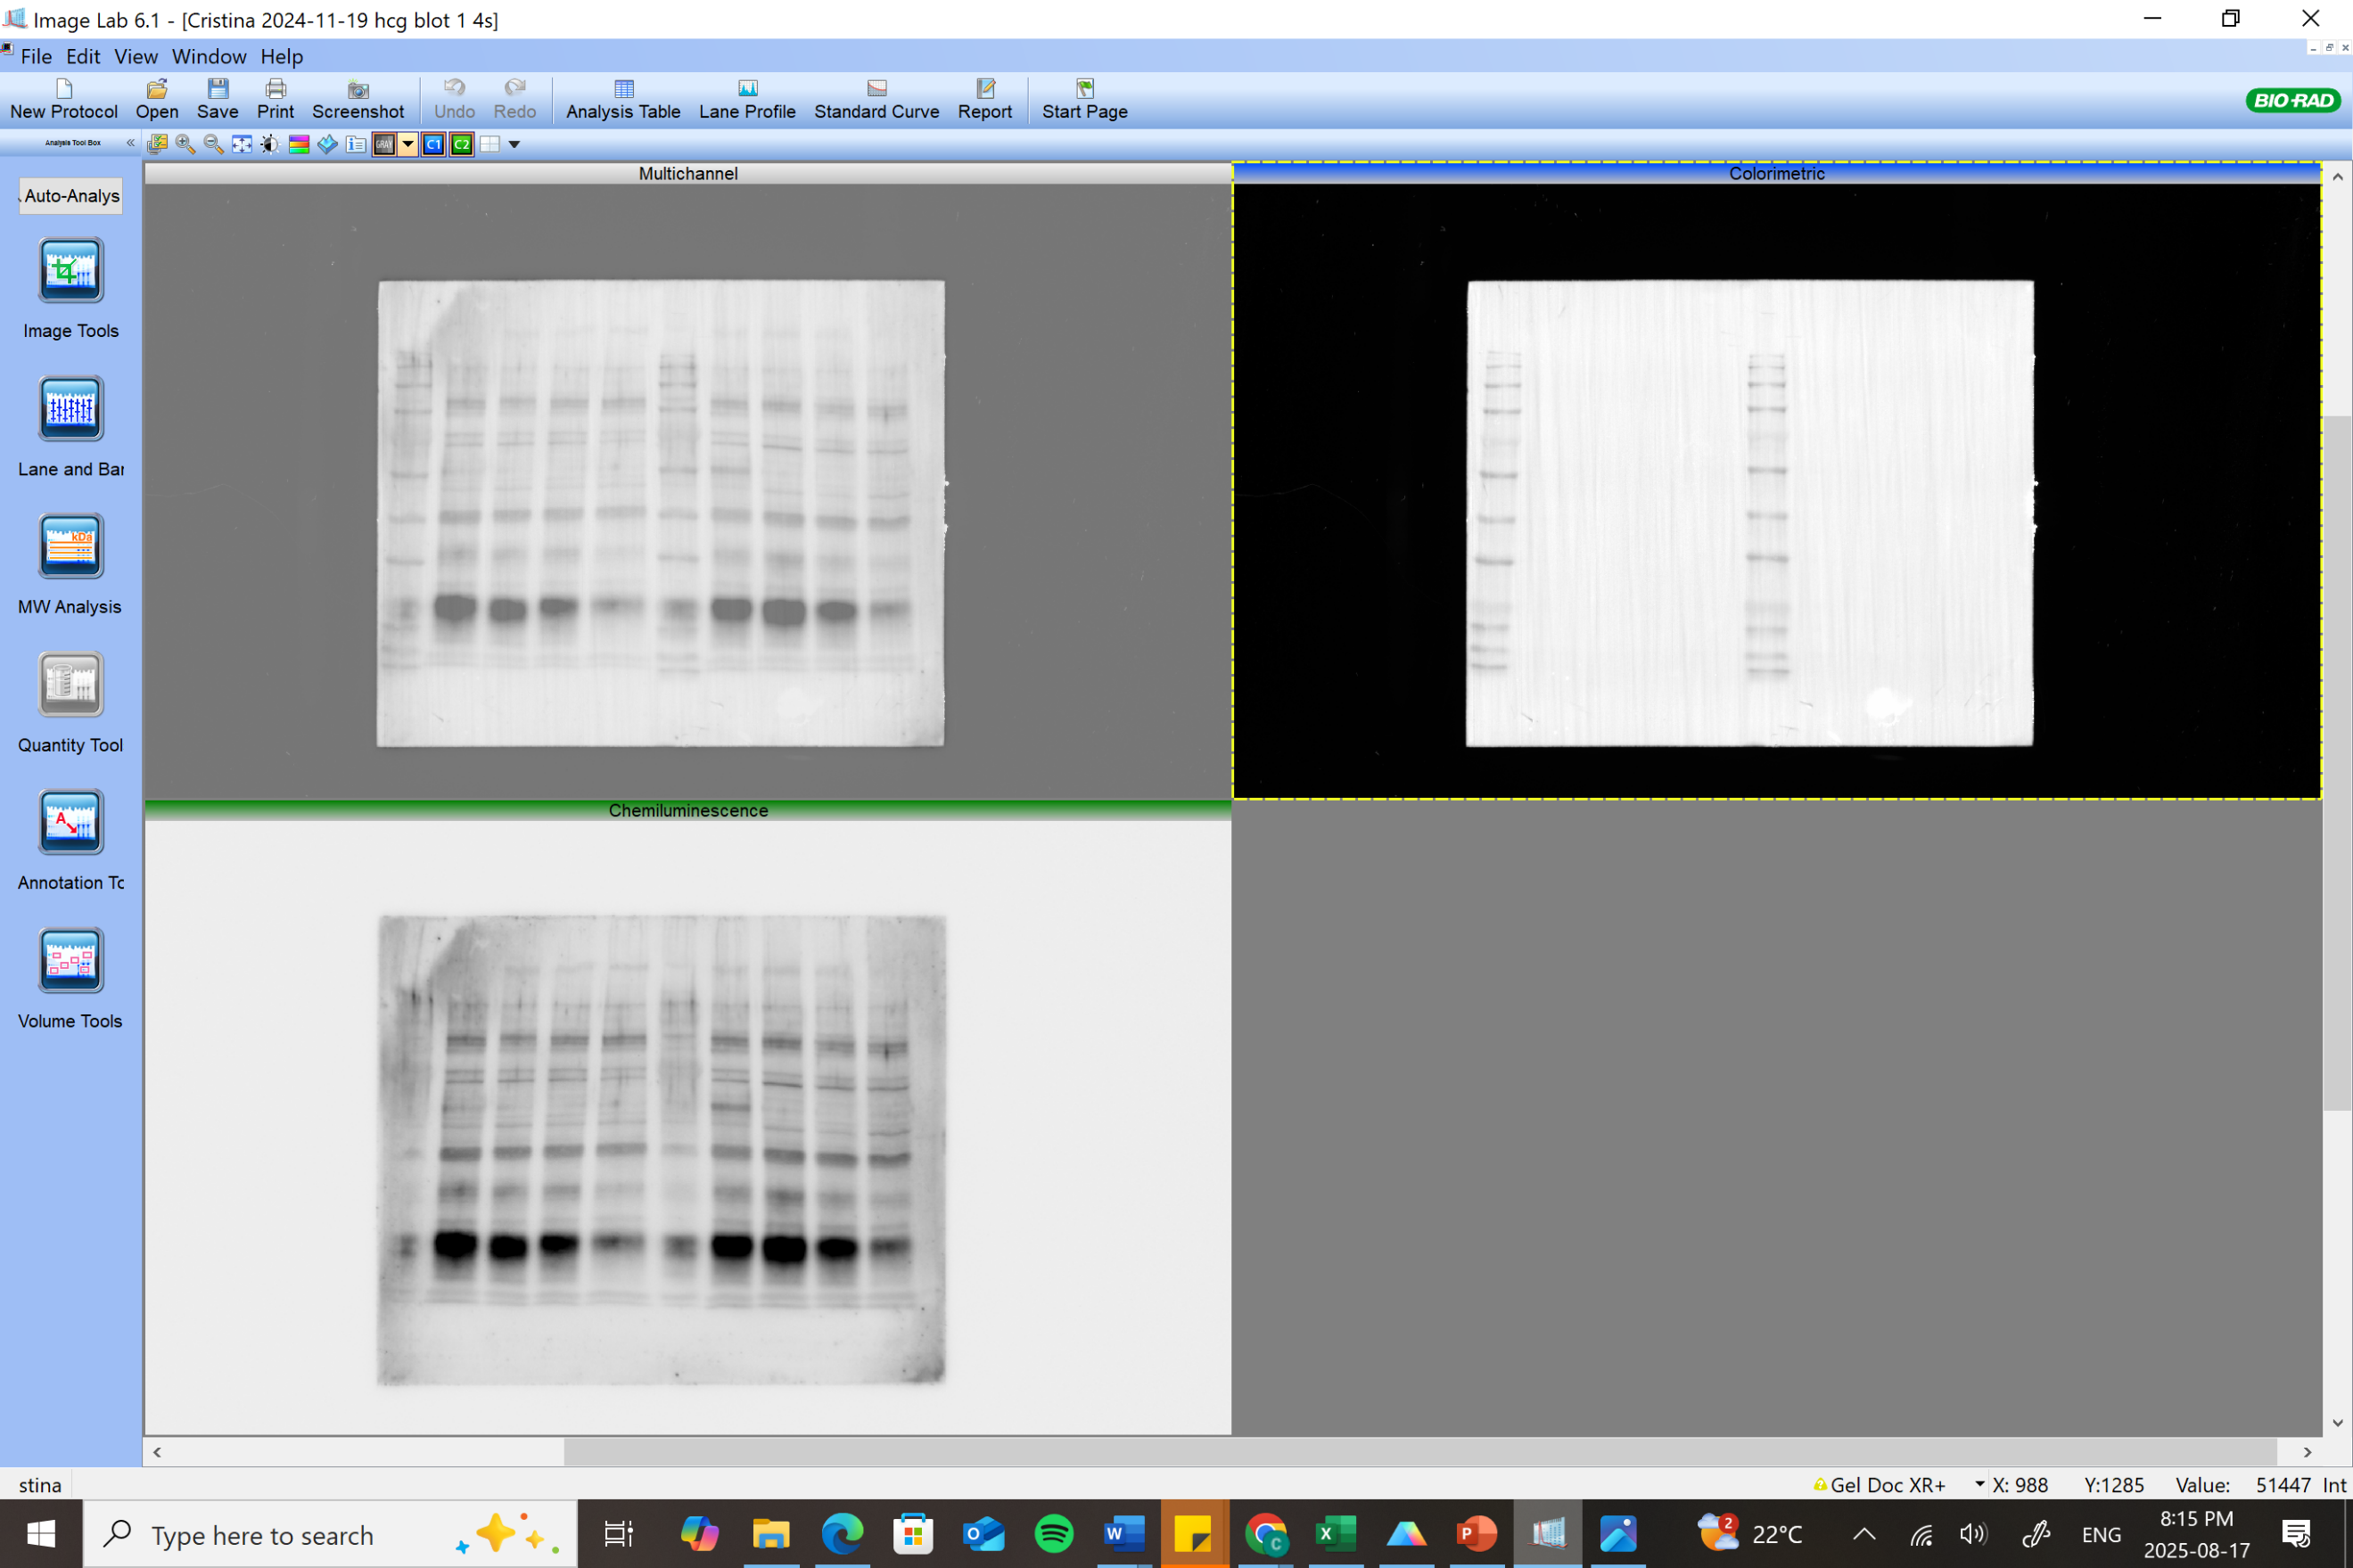
**
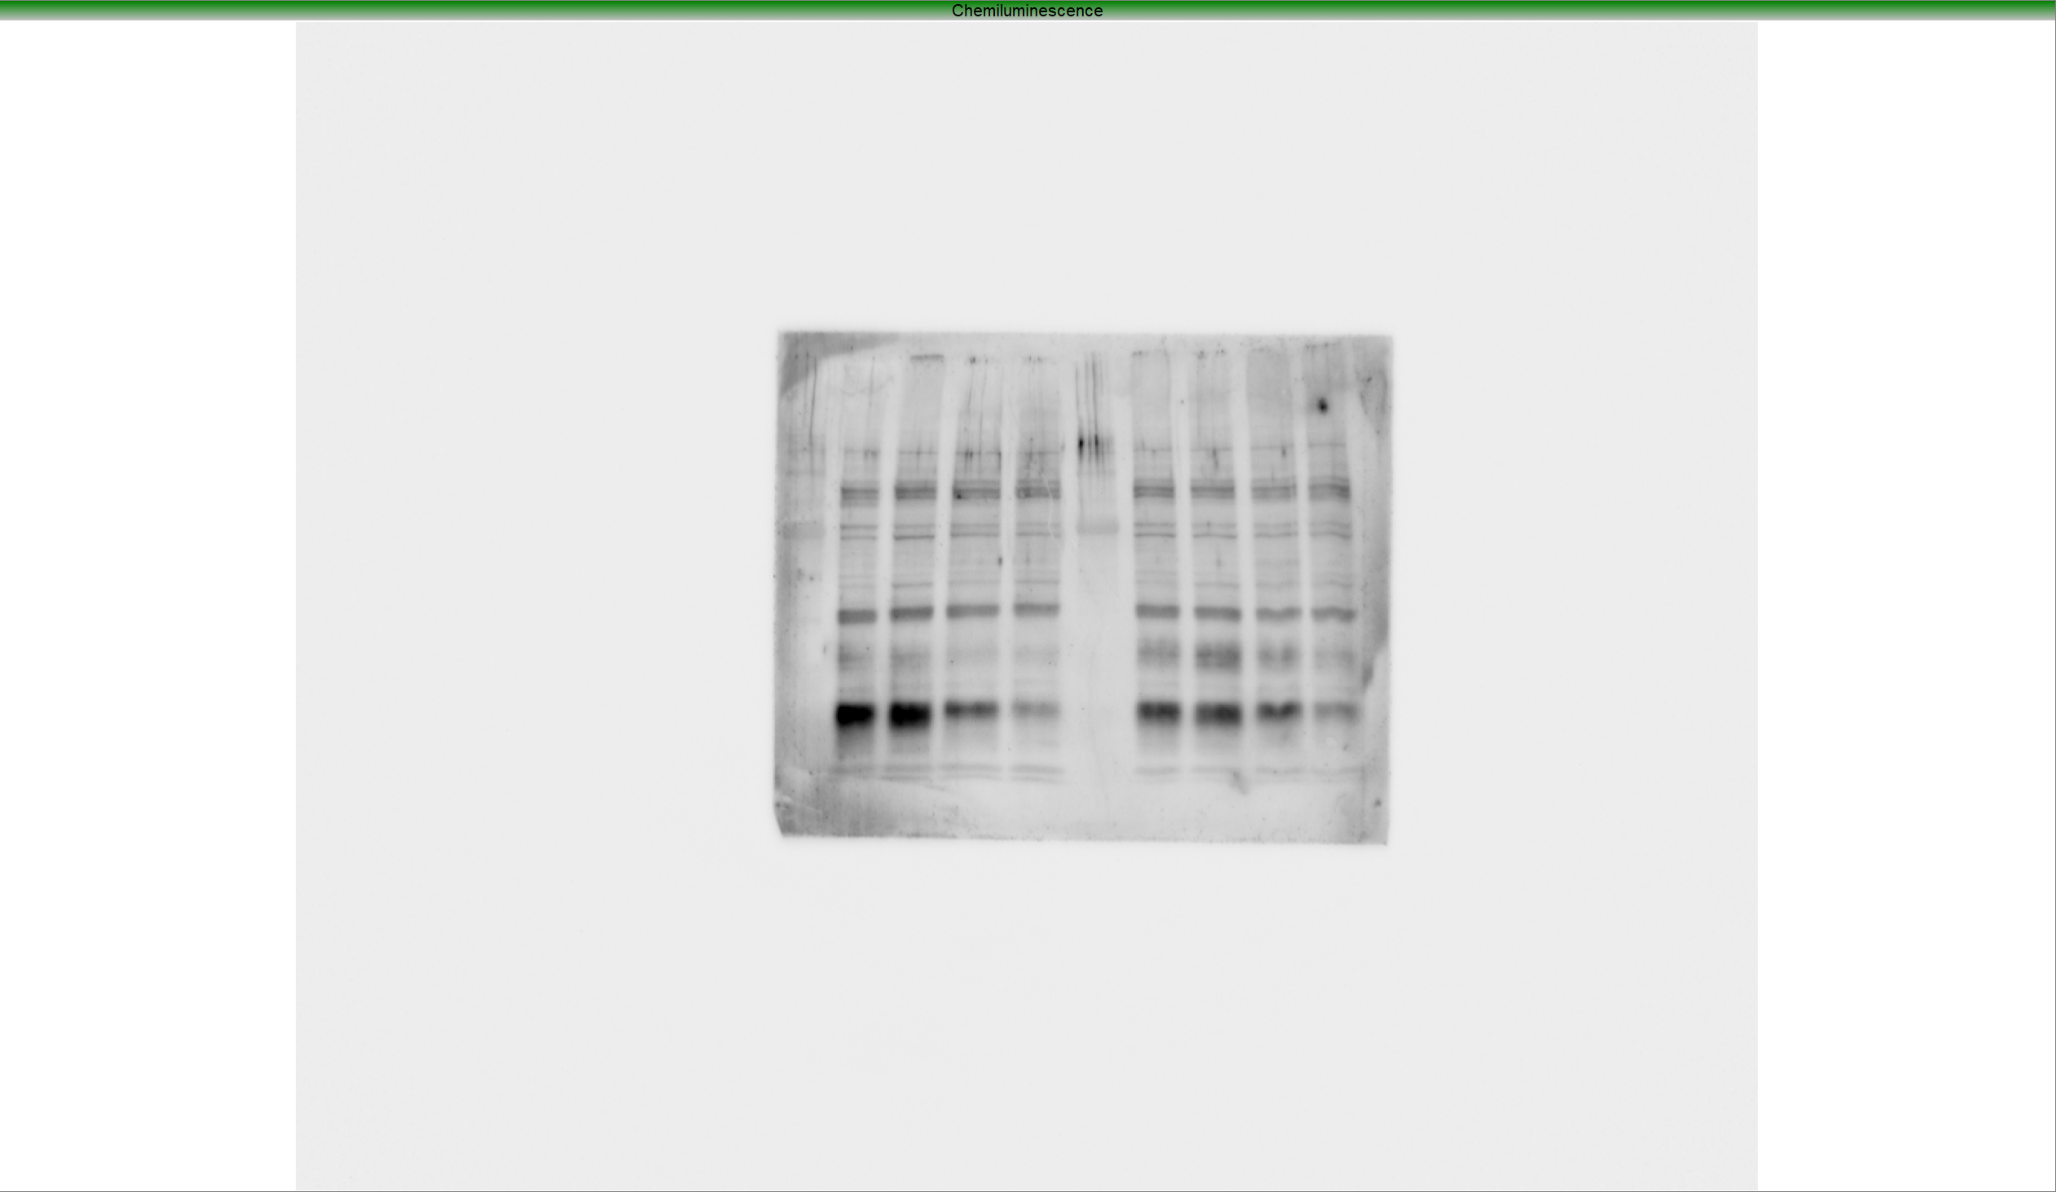

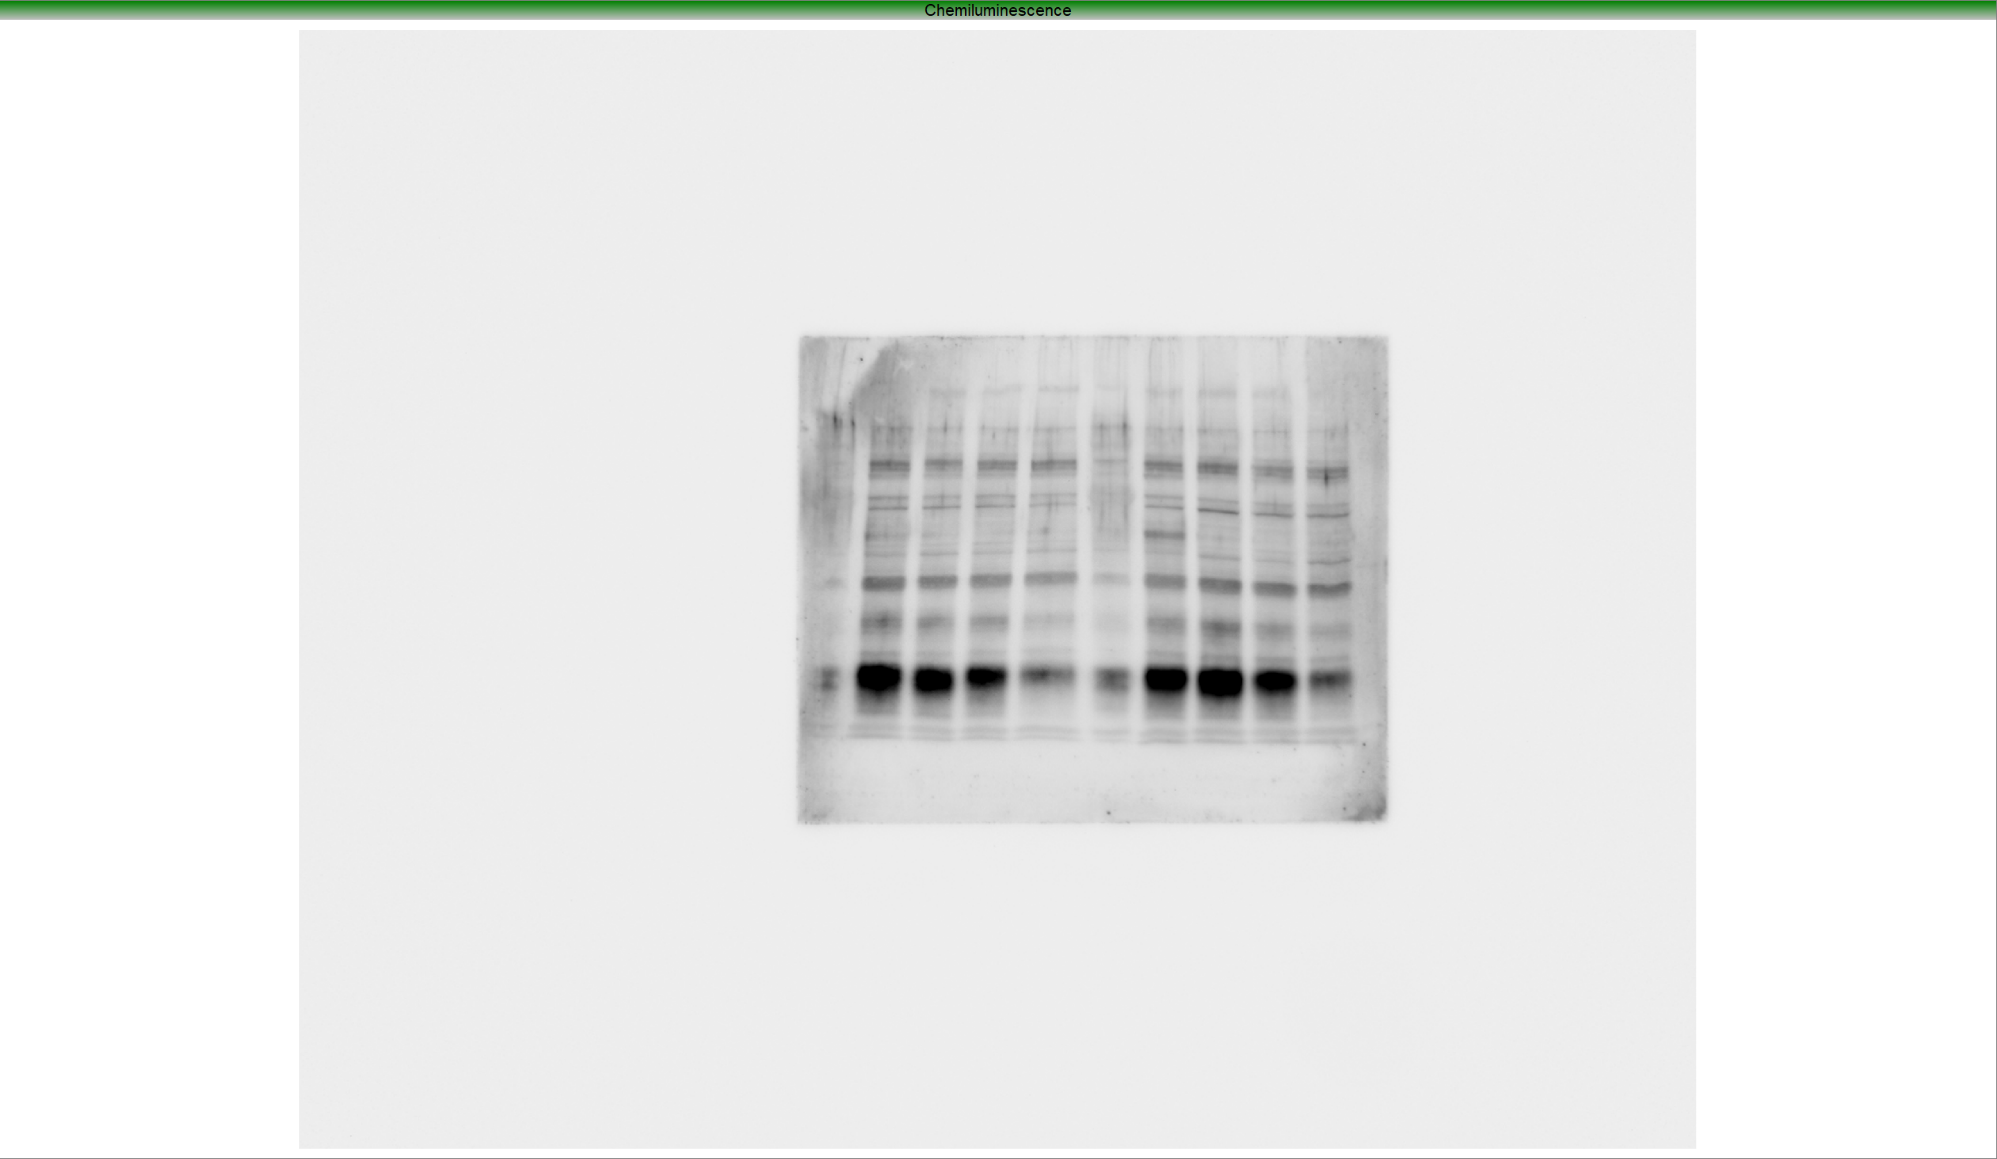
**(a) (b)**

70 kDa

55 kDa

40 kDa

8 kDa

Pristine™ Pre-Stained Protein Ladder

**20 kDa**

28 kDa

20 kDa

13 kDa

**20 kDa**


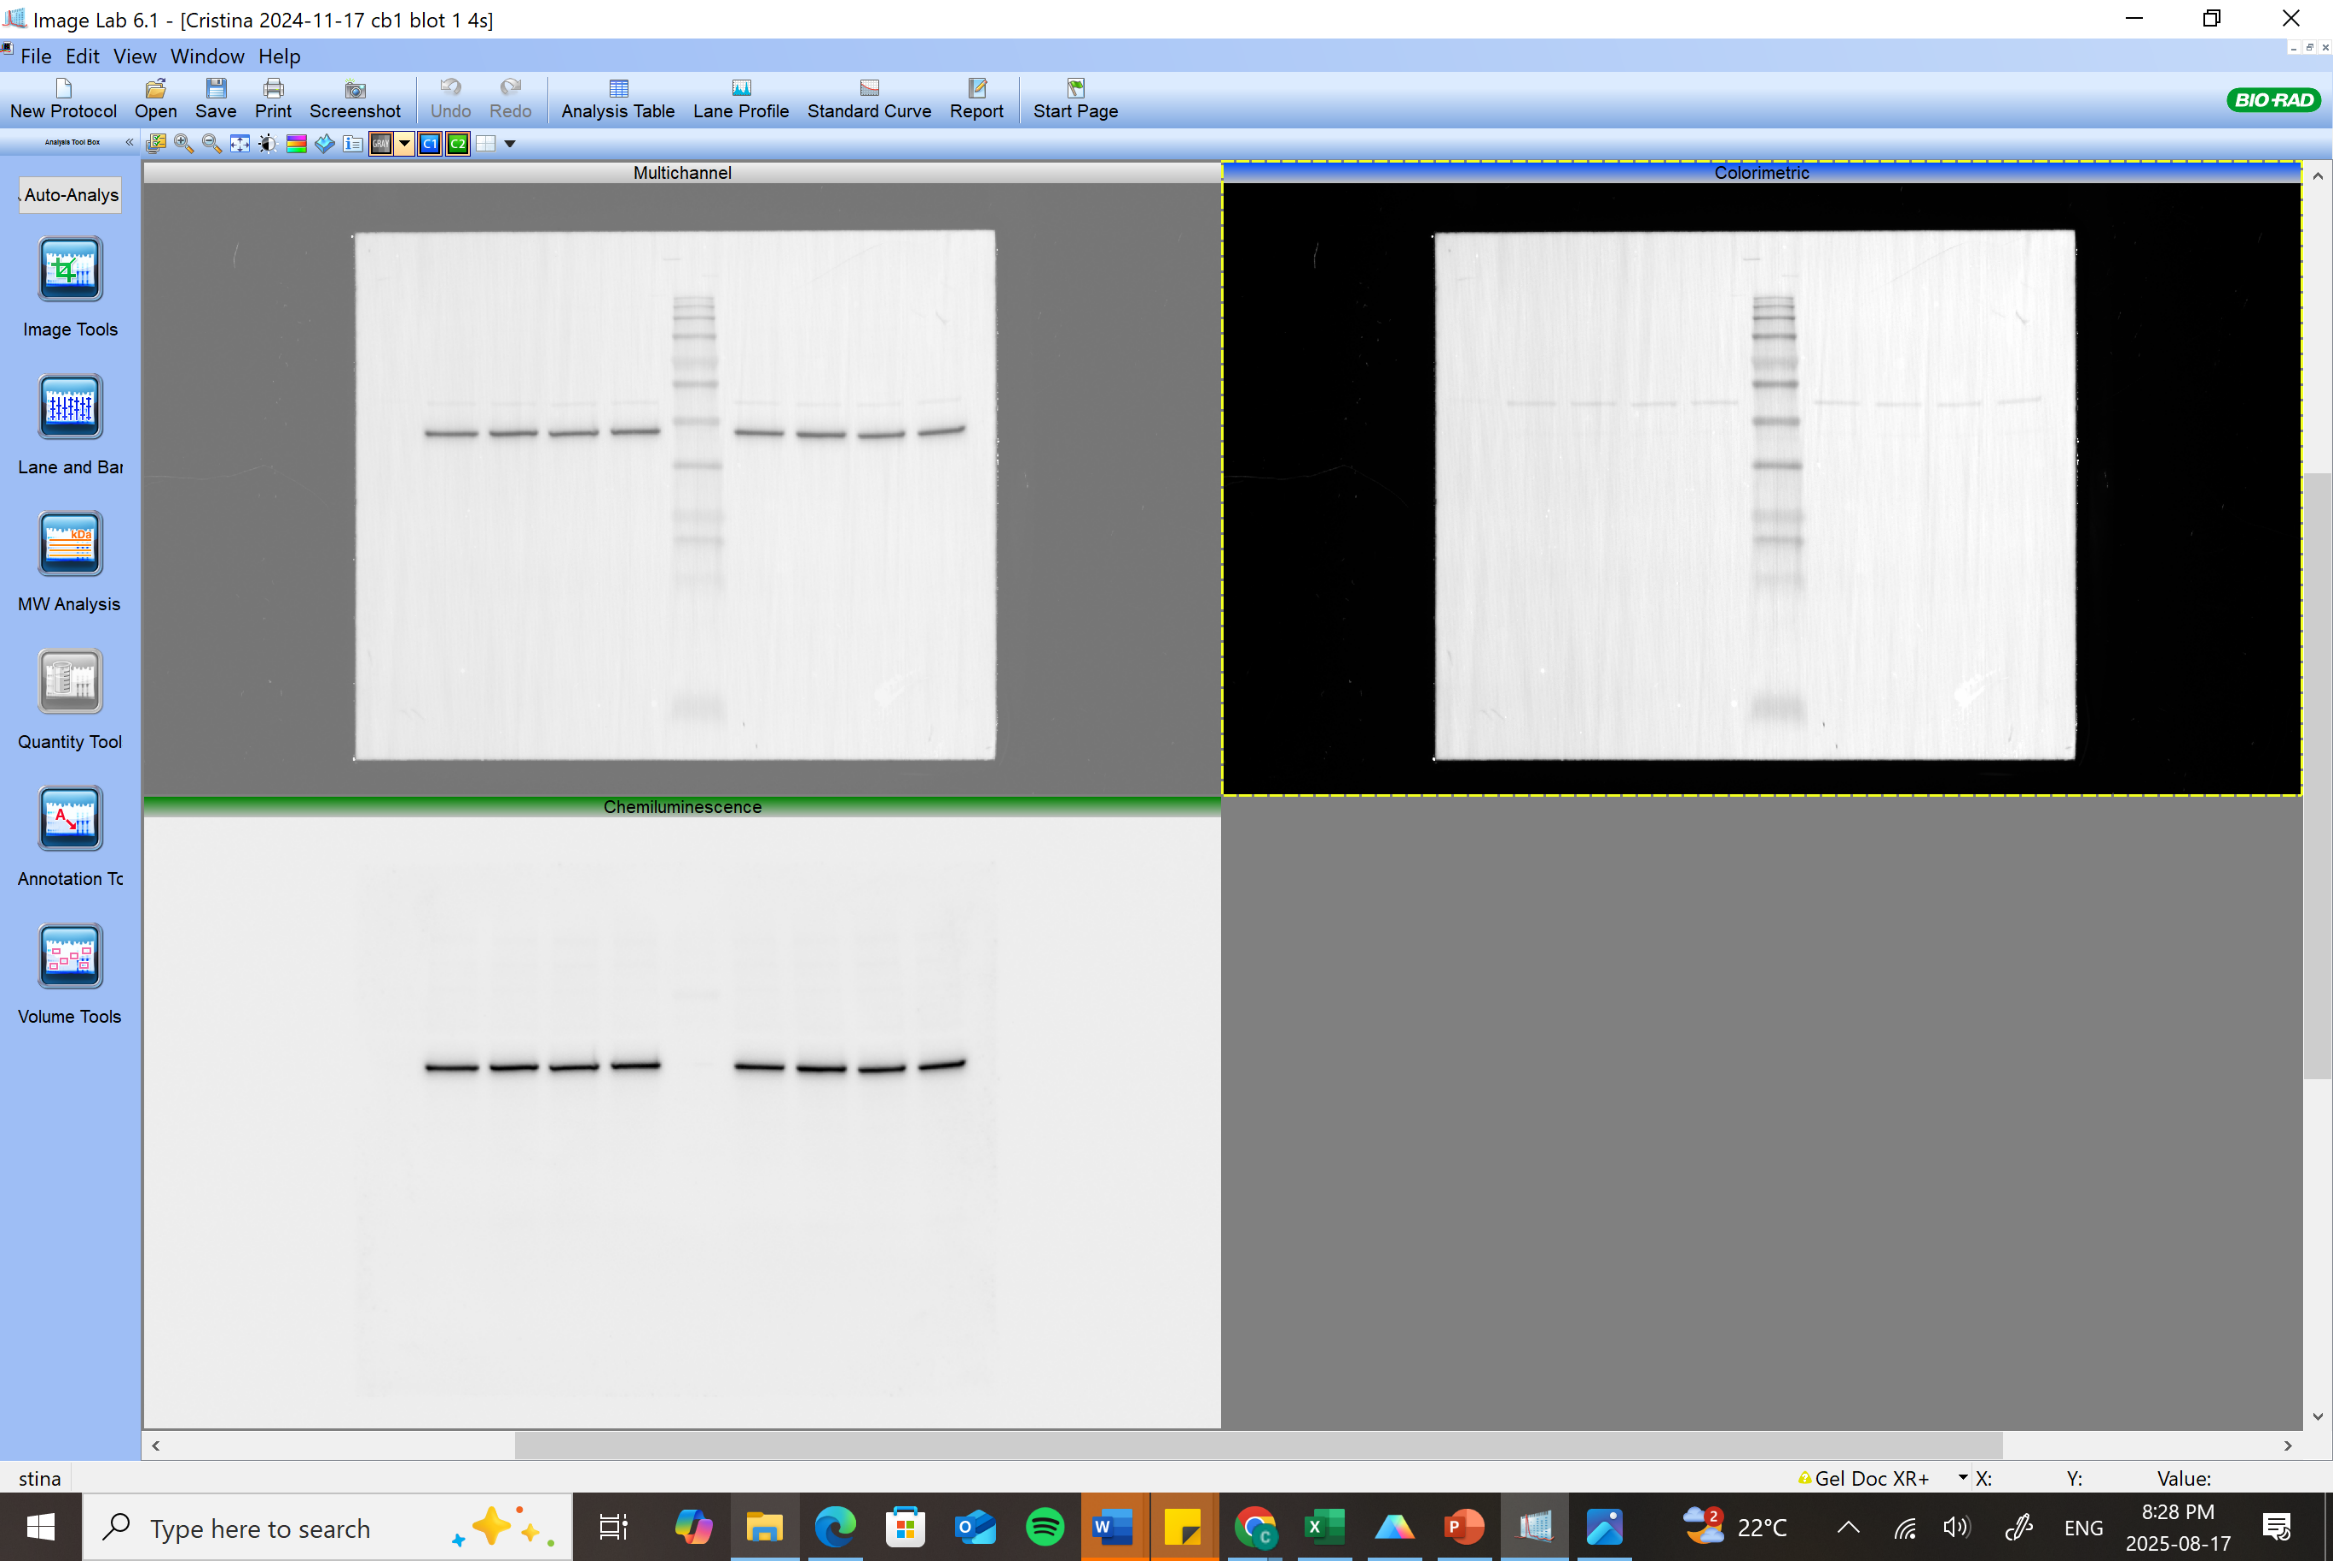

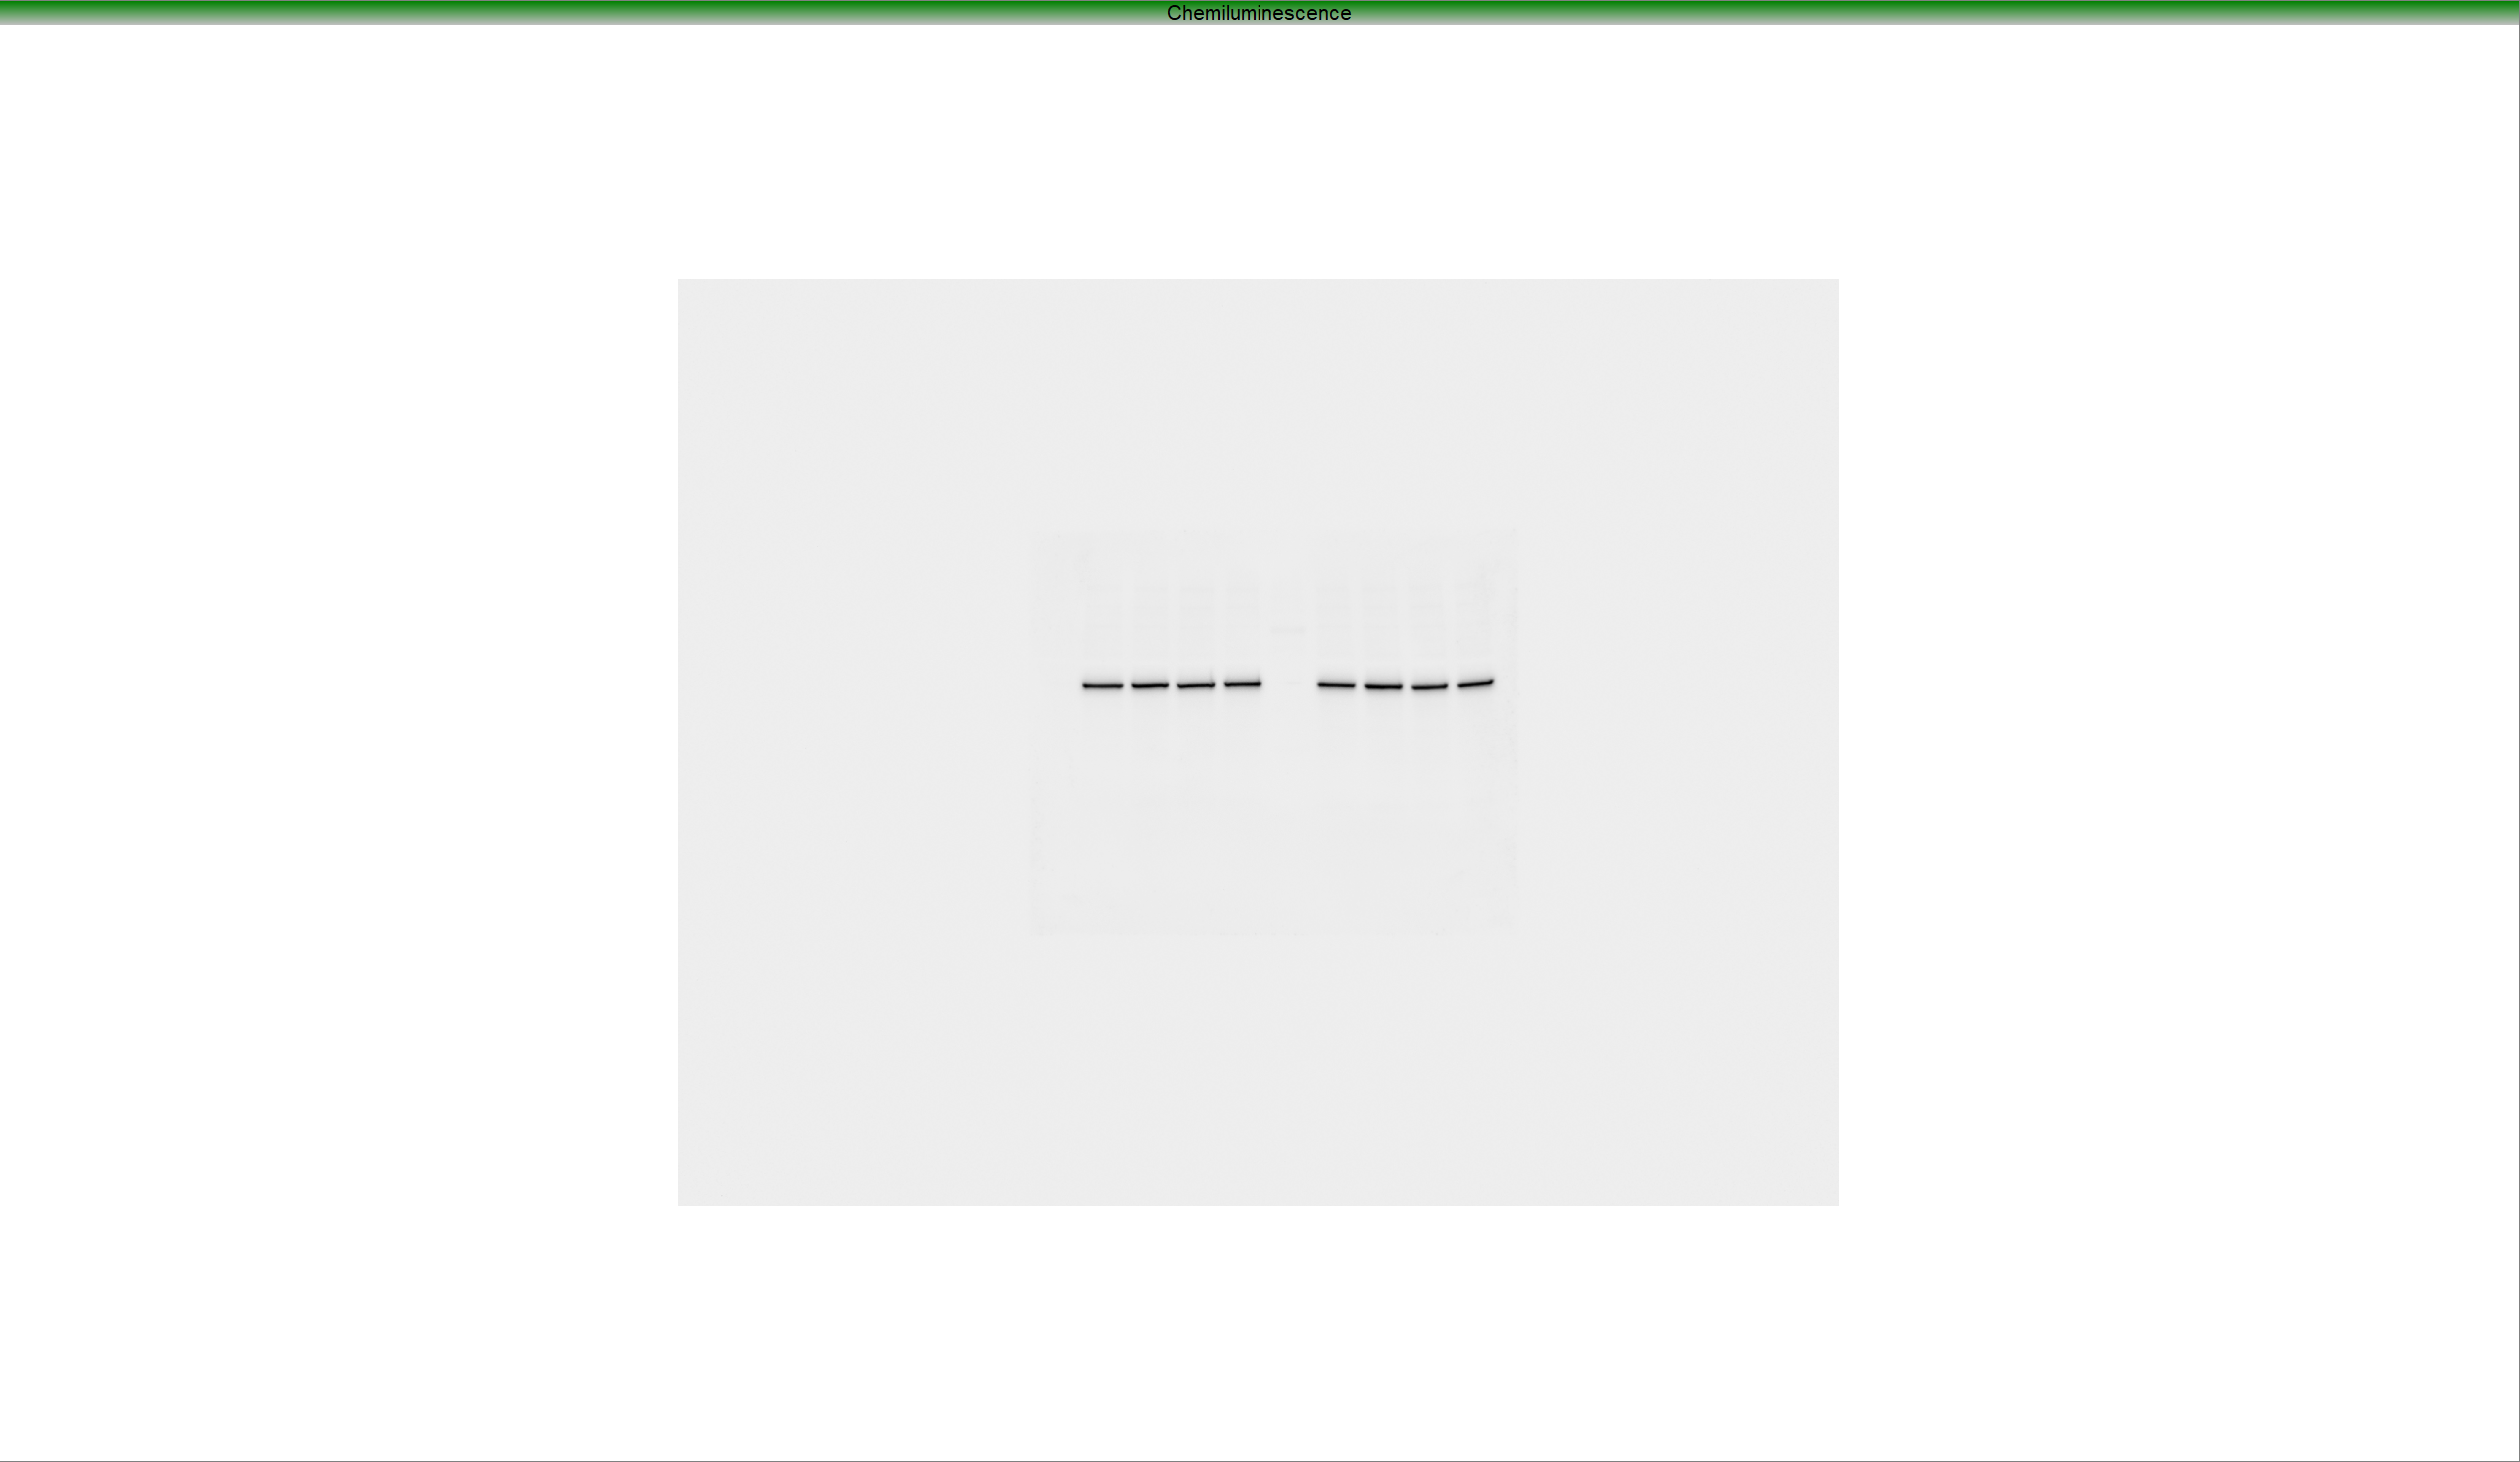

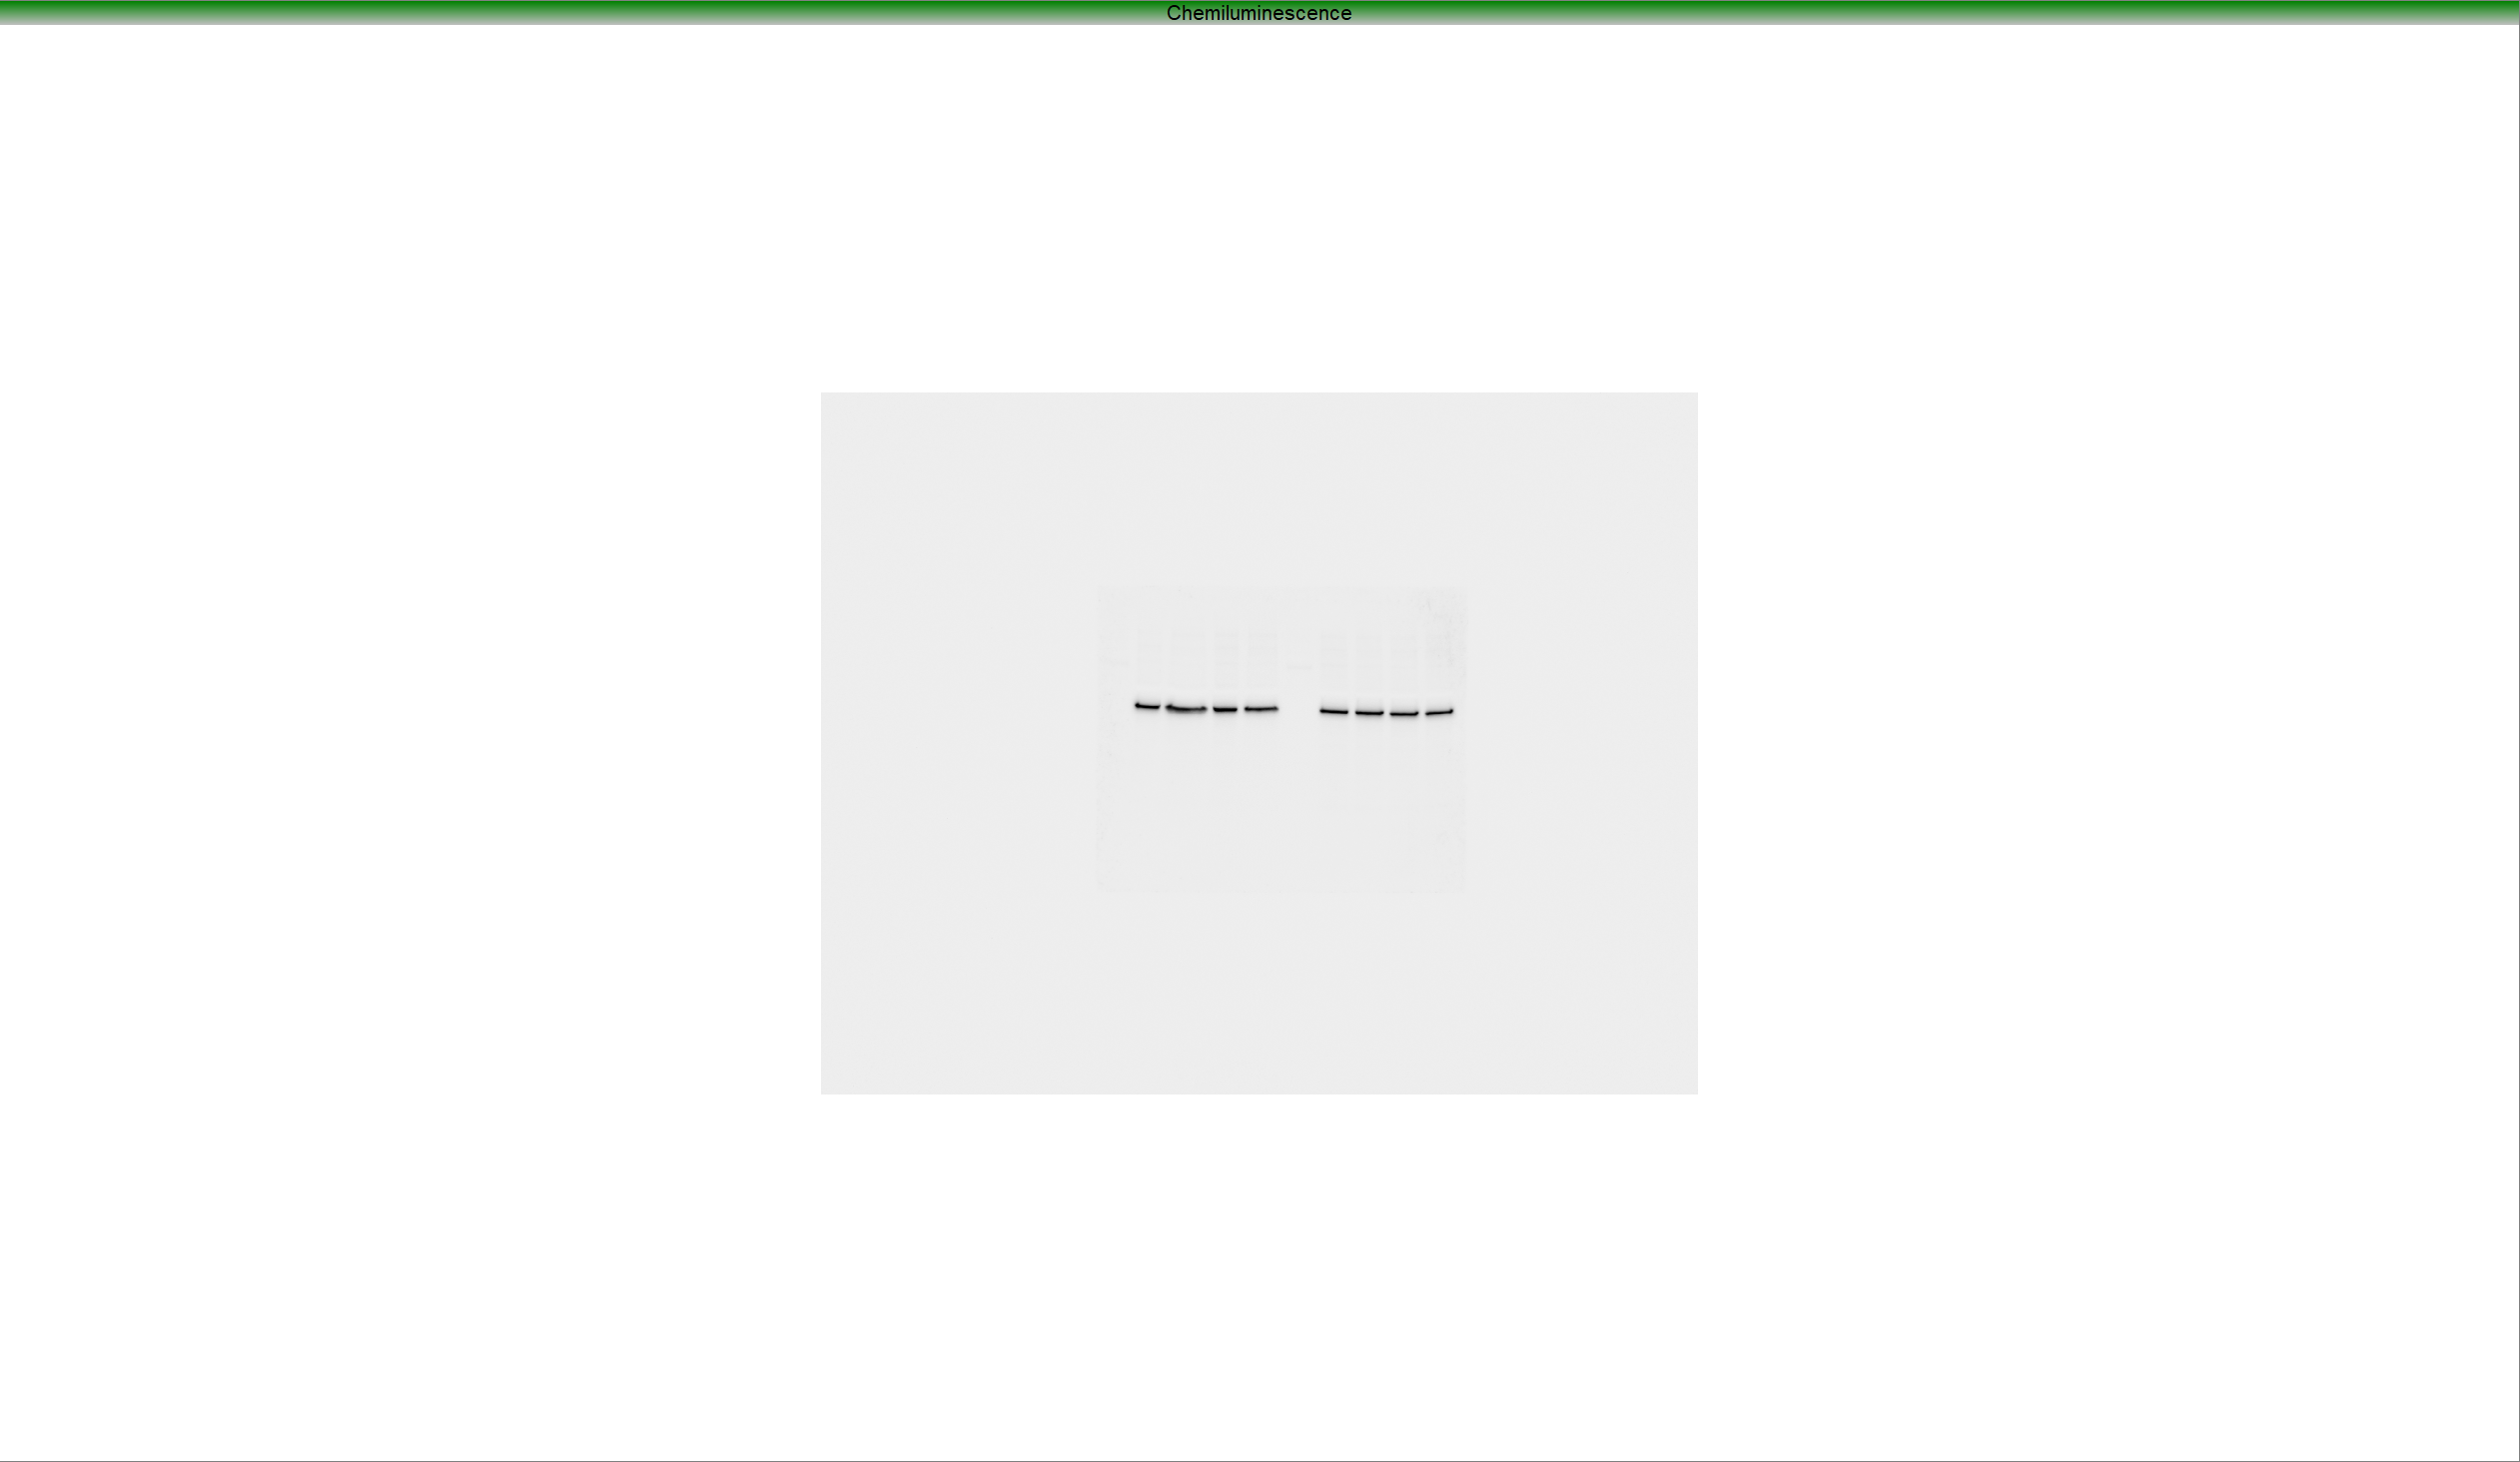
**(c) (d)**

70 kDa

28 kDa

40 kDa

55 kDa

20 kDa

**39 kDa**

**39 kDa**

Pristine™ Pre-Stained Protein Ladder


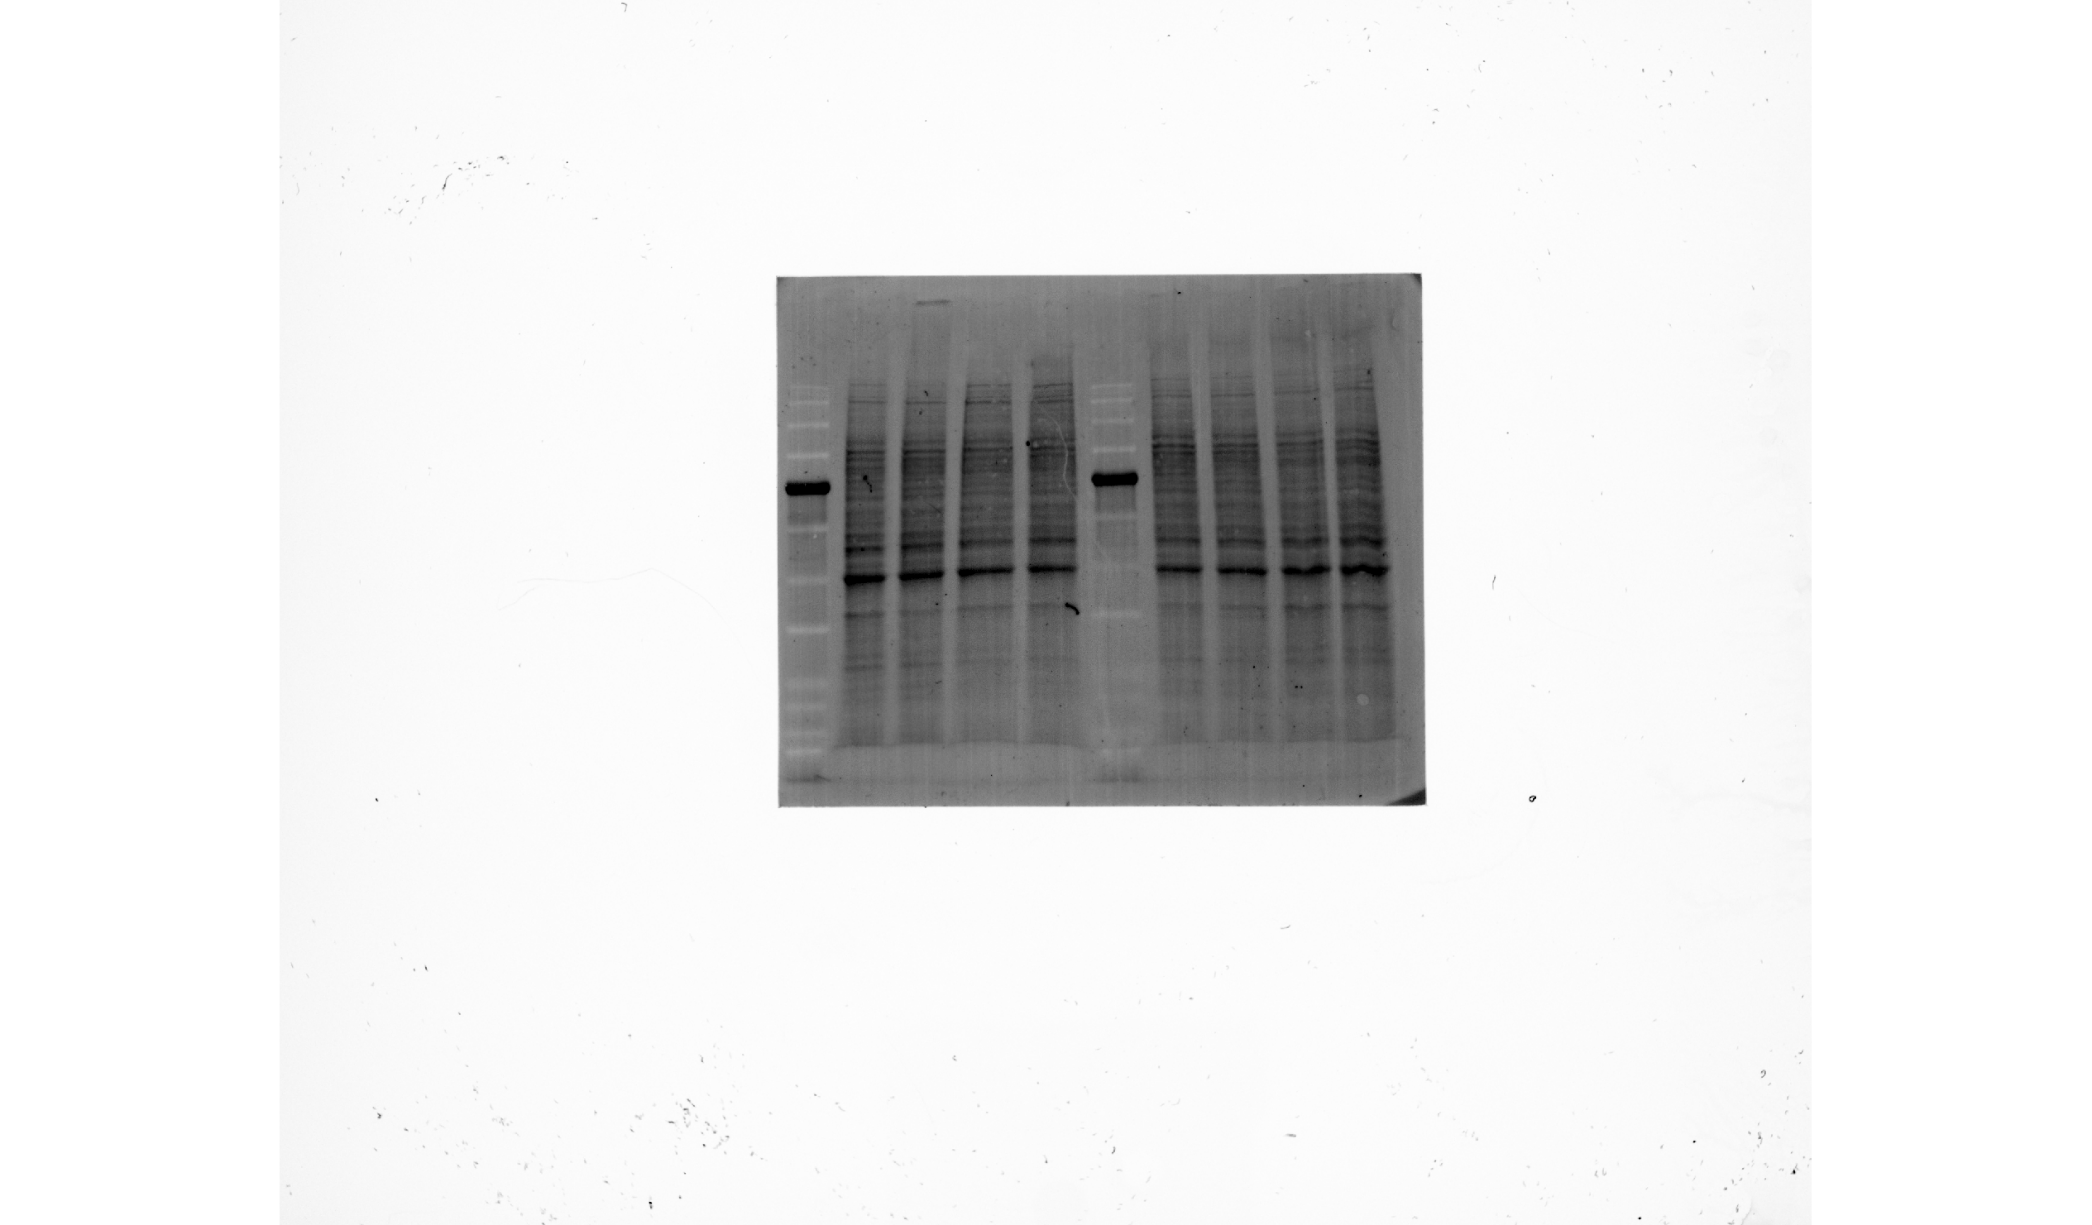
**(e) (f)**


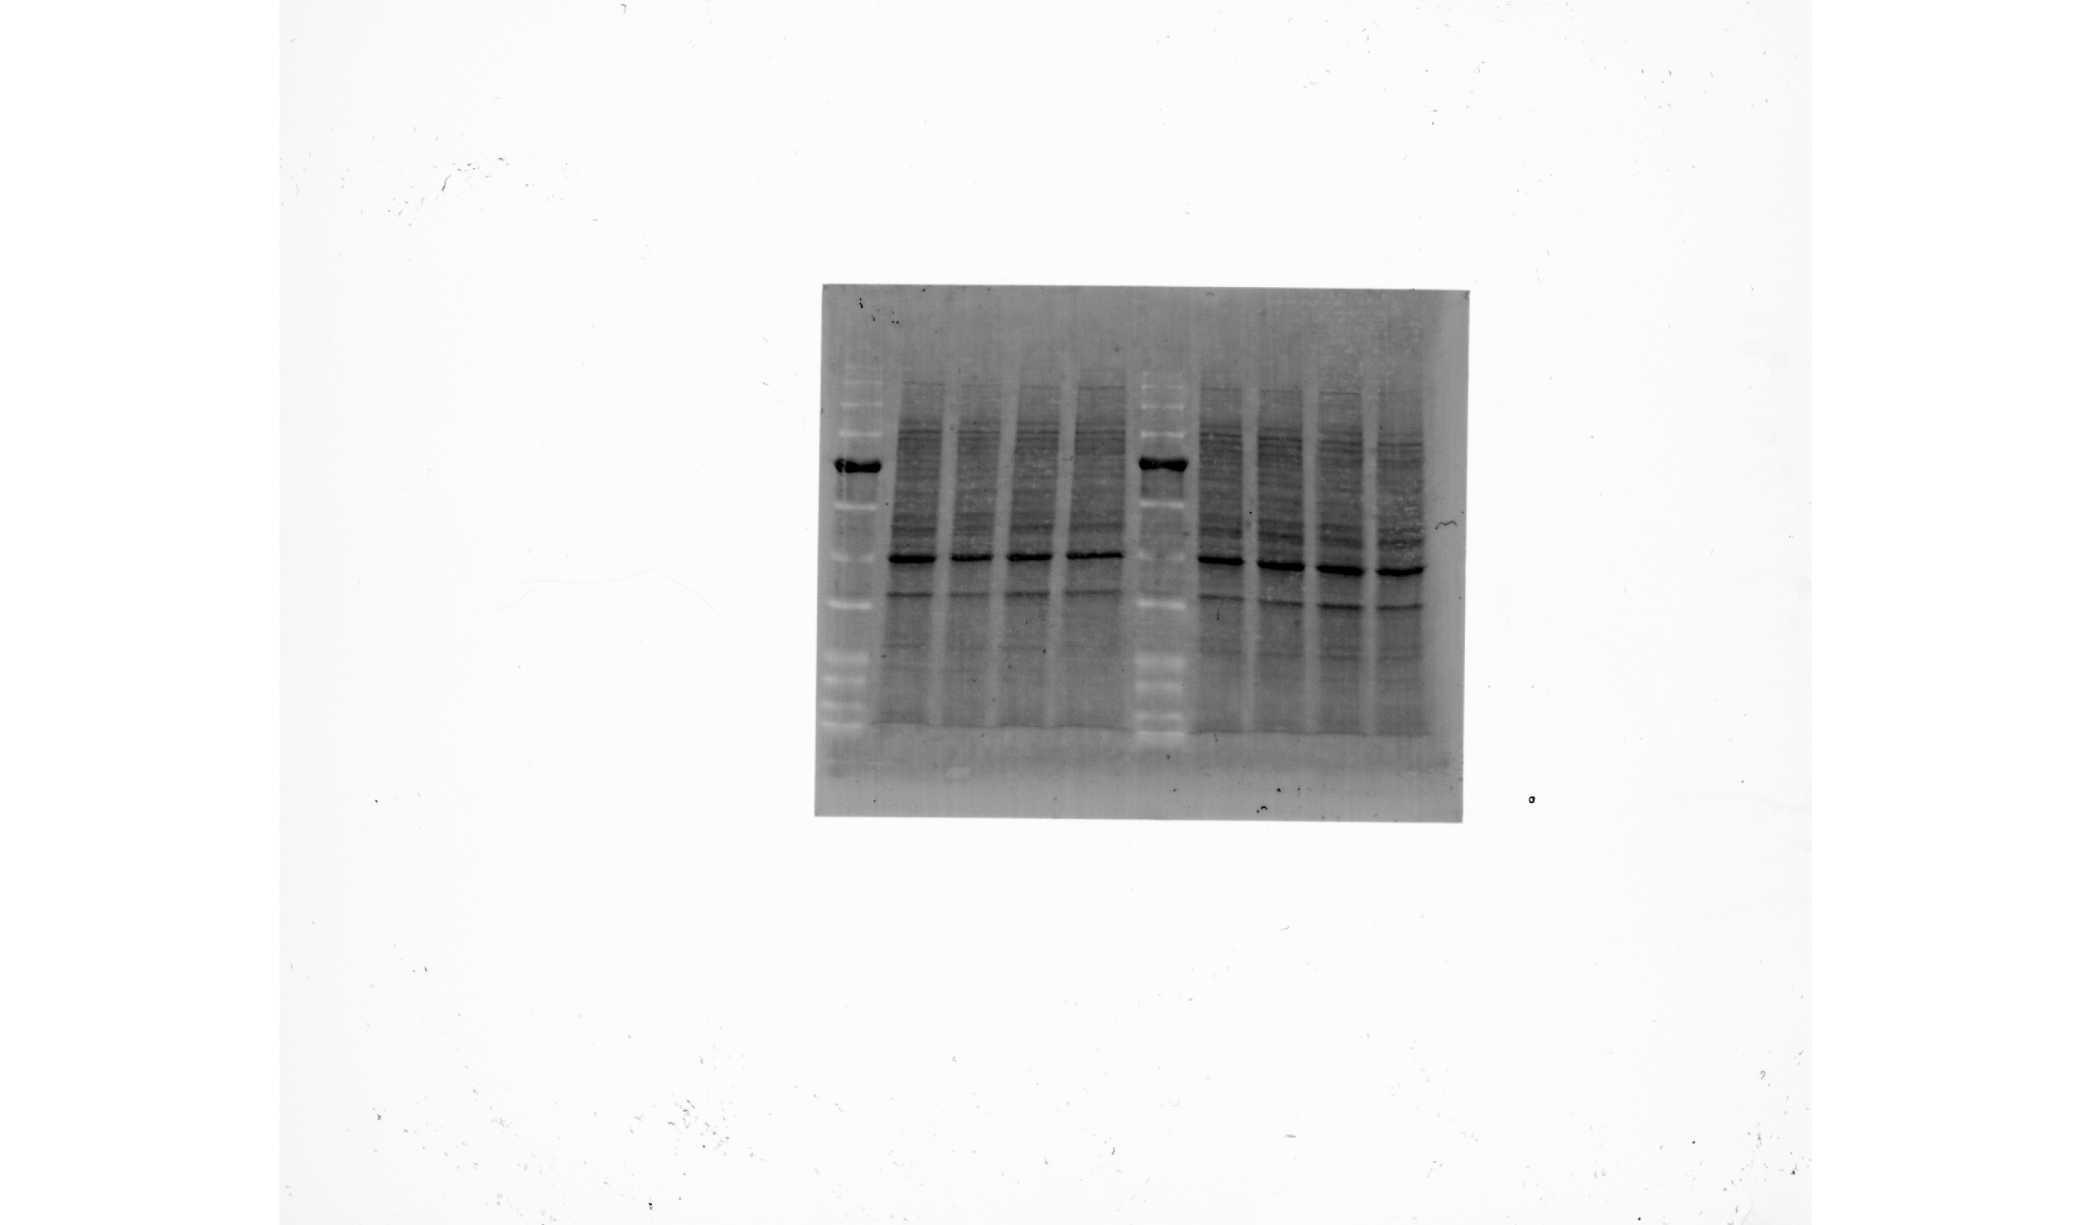


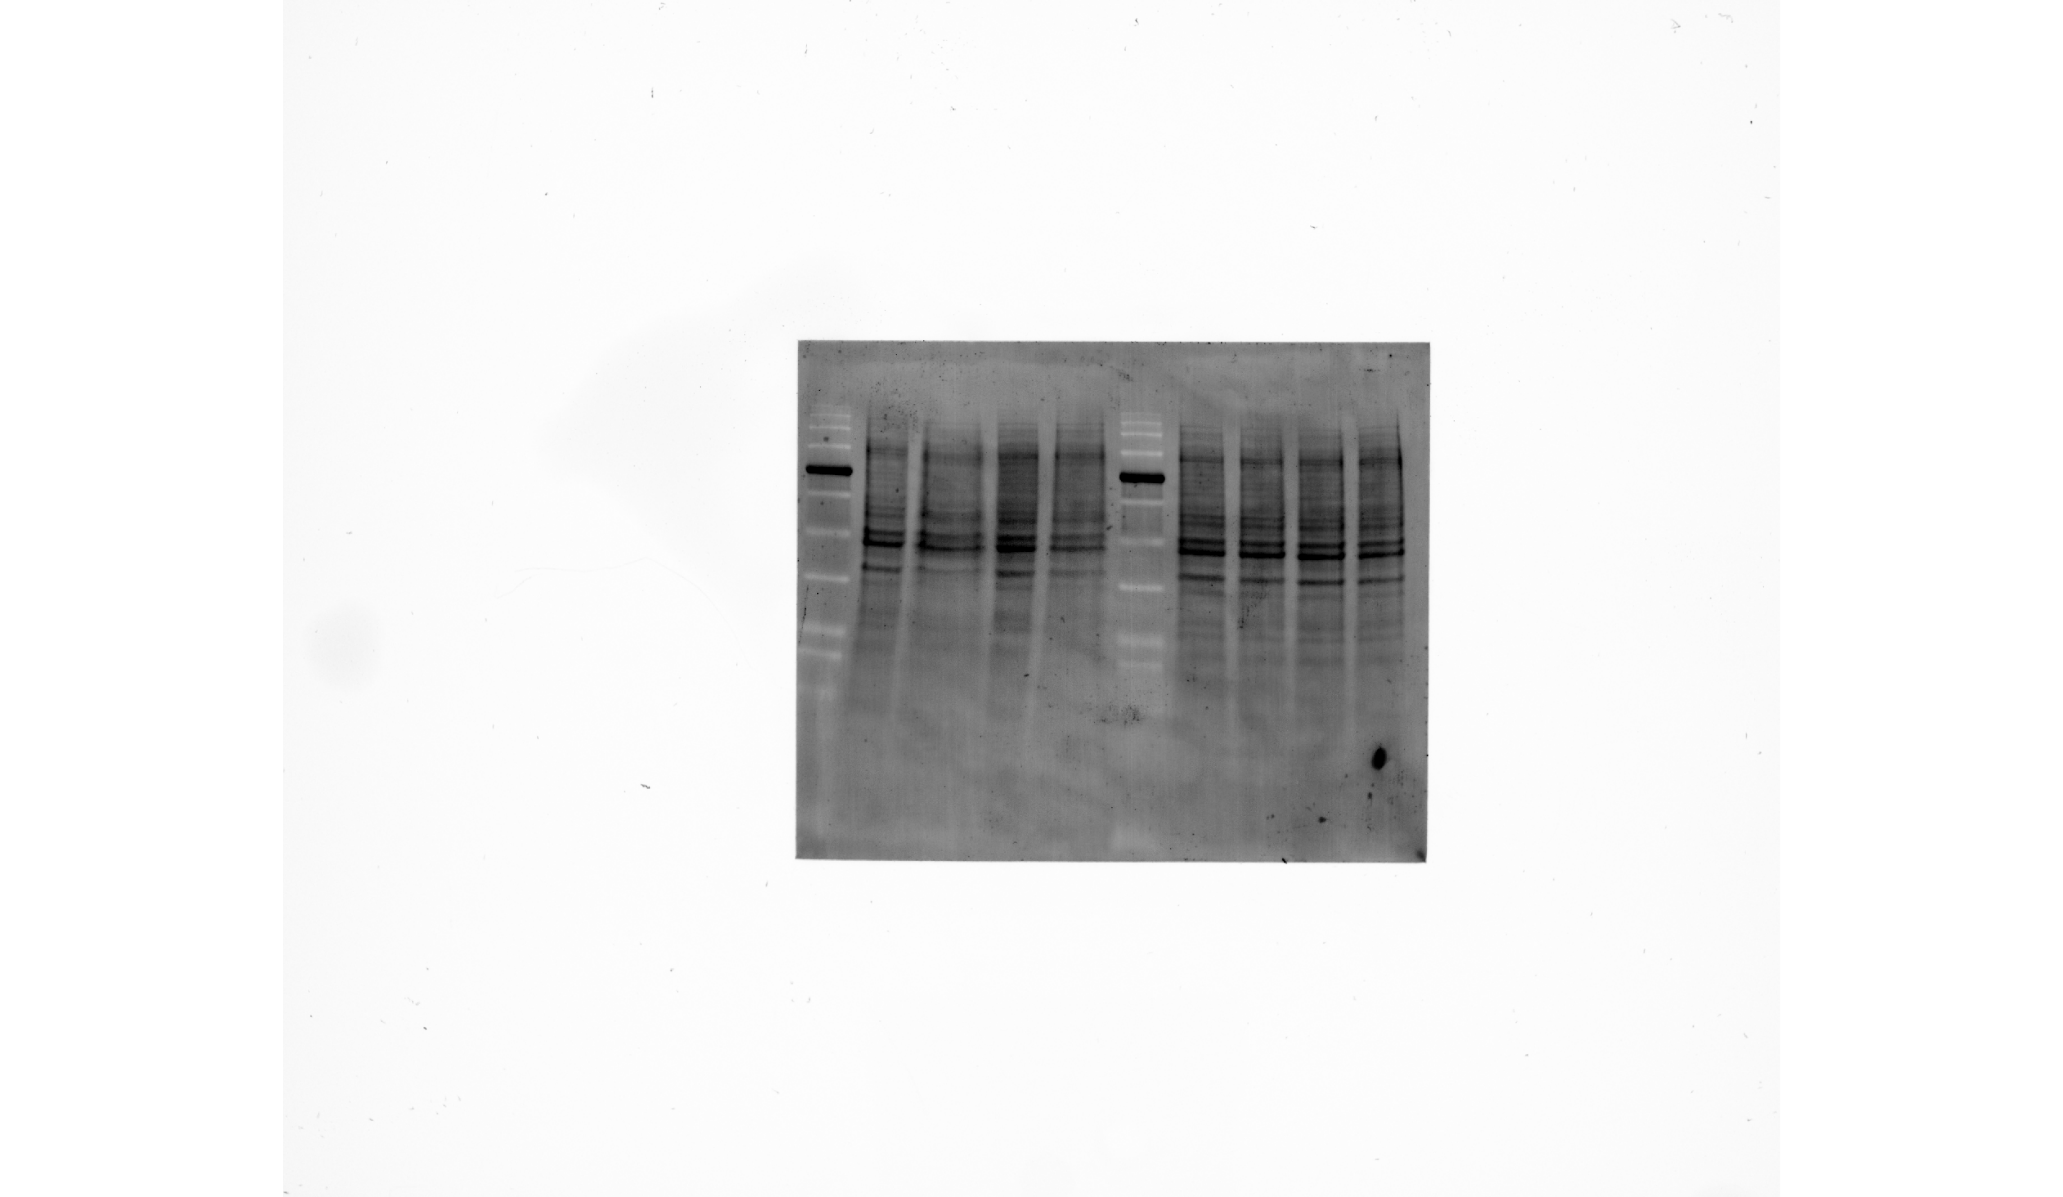
**(g) (h)**


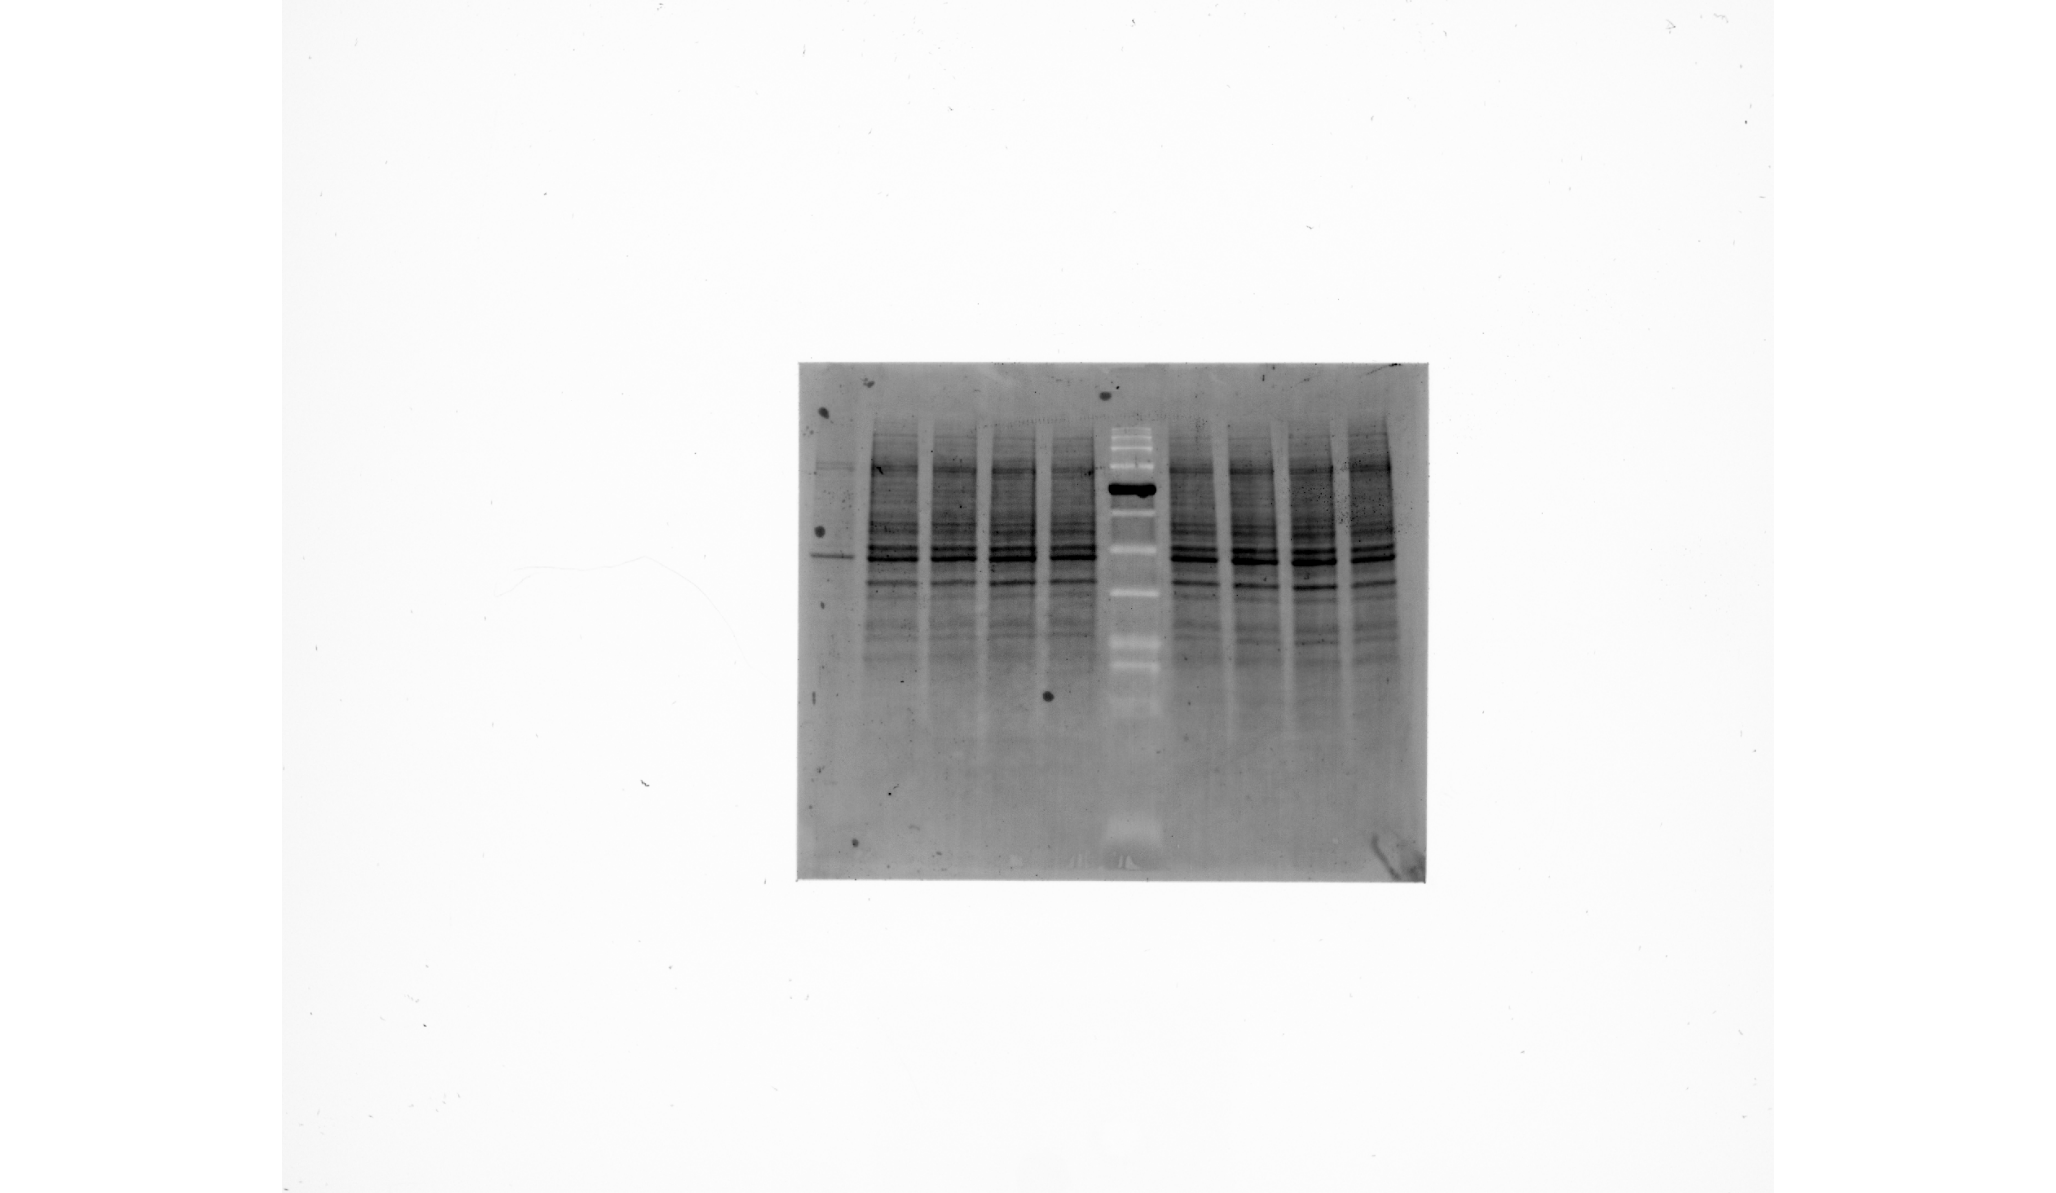


**Figure S3. Representation of composite Western blot images and stain-free gel images.** Uncropped Western blot images representing figures displayed in the manuscript. (**a)** hCG (n1-n2); **(b)** hCG (n3-n4); **(c)** CB1R (n1-n2); **(d)** CB1R (n3-n4) Total protein visualized using Stain-Free gels used for the Western blot normalization in panels **(e)** hCG (n1-n2); **(f)** hCG (n3-n4) **(g)** CB1R (n1-n2), **(h)** CB1R (n3-n4).
